# Supplementary material for: Association of FKBP51 with Priming of Autophagy Pathways and Mediation of Antidepressant Treatment Response: Evidence in Cells, Mice, and Humans
Source: PLoS Med. 2014 Nov 11;11(11):e1001755. doi: 10.1371/journal.pmed.1001755 (PMC4227651; doi:10.1371/journal.pmed.1001755)
Supplement: Text S2 — ARRIVE guidelines checklist. (DOC) [file pmed.1001755.s016.doc]

STROBE Statement—Checklist of items that should be included in reports of ***cohort studies***

|  | Item No | Recommendation |
| --- | --- | --- |
| **Title and abstract** | 1 | (*a*) Indicate the study’s design with a commonly used term in the title or the abstract Page 1-3 |
| (*b*) Provide in the abstract an informative and balanced summary of what was done and what was found Page 3 |
| Introduction | | |
| Background/rationale | 2 | Explain the scientific background and rationale for the investigation being reported Page 4-5 |
| Objectives | 3 | State specific objectives, including any prespecified hypotheses Page 5-6 |
| Methods | | |
| Study design | 4 | Present key elements of study design early in the paper Page 2,5 |
| Setting | 5 | Describe the setting, locations, and relevant dates, including periods of recruitment, exposure, follow-up, and data collection  Table 1 and page 16 and 17 |
| Participants | 6 | (*a*) Give the eligibility criteria, and the sources and methods of selection of participants. Describe methods of follow-up Pages 16-17 |
| (*b*)For matched studies, give matching criteria and number of exposed and unexposed NA |
| Variables | 7 | Clearly define all outcomes, exposures, predictors, potential confounders, and effect modifiers. Give diagnostic criteria, if applicable. Pages 16-17, Table 1 |
| Data sources/ measurement | 8* | For each variable of interest, give sources of data and details of methods of assessment (measurement). Describe comparability of assessment methods if there is more than one group. See methods section |
| Bias | 9 | Describe any efforts to address potential sources of bias. Page 16 |
| Study size | 10 | Explain how the study size was arrived at. Pages 16 |
| Quantitative variables | 11 | Explain how quantitative variables were handled in the analyses. If applicable, describe which groupings were chosen and why. Page 16-18 |
| Statistical methods | 12 | (*a*) Describe all statistical methods, including those used to control for confounding. Page 17,18, Table S2 |
| (*b*) Describe any methods used to examine subgroups and interactions NA |
| (*c*) Explain how missing data were addressed NA |
| (*d*) If applicable, explain how loss to follow-up was addressed NA |
| (*e*) Describe any sensitivity analyses NA |
| Results | | |
| Participants | 13* | (a) Report numbers of individuals at each stage of study—eg numbers potentially eligible, examined for eligibility, confirmed eligible, included in the study, completing follow-up, and analysed. Table 1, Page 16 |
| (b) Give reasons for non-participation at each stage NA |
| (c) Consider use of a flow diagram |
| Descriptive data | 14* | (a) Give characteristics of study participants (eg demographic, clinical, social) and information on exposures and potential confounders. Table 1, Table 2 |
| (b) Indicate number of participants with missing data for each variable of interest. Page 47 |
| (c) Summarise follow-up time (eg, average and total amount). NA |
| Outcome data | 15* | Report numbers of outcome events or summary measures over time |
| Main results | 16 | (*a*) Give unadjusted estimates and, if applicable, confounder-adjusted estimates and their precision (eg, 95% confidence interval). Make clear which confounders were adjusted for and why they were included. NA |
| (*b*) Report category boundaries when continuous variables were categorized. NA |
| (*c*) If relevant, consider translating estimates of relative risk into absolute risk for a meaningful time period. NA |
| Other analyses | 17 | Report other analyses done—eg analyses of subgroups and interactions, and sensitivity analyses. NA |
| Discussion | | |
| Key results | 18 | Summarise key results with reference to study objectives. Page 30 |
| Limitations | 19 | Discuss limitations of the study, taking into account sources of potential bias or imprecision. Discuss both direction and magnitude of any potential bias. Page 32 |
| Interpretation | 20 | Give a cautious overall interpretation of results considering objectives, limitations, multiplicity of analyses, results from similar studies, and other relevant evidence. Page 32 |
| Generalisability | 21 | Discuss the generalisability (external validity) of the study results. Page 32-33 |
| Other information | | |
| Funding | 22 | Give the source of funding and the role of the funders for the present study and, if applicable, for the original study on which the present article is based. Page 41 |

*Give information separately for exposed and unexposed groups.

**Note:** An Explanation and Elaboration article discusses each checklist item and gives methodological background and published examples of transparent reporting. The STROBE checklist is best used in conjunction with this article (freely available on the Web sites of PLoS Medicine at http://www.plosmedicine.org/, Annals of Internal Medicine at http://www.annals.org/, and Epidemiology at http://www.epidem.com/). Information on the STROBE Initiative is available at http://www.strobe-statement.org.
